# Supplementary material for: RNA and Sugars, Unique Properties of Bacteriophages Infecting Multidrug Resistant Acinetobacter radioresistens Strain LH6
Source: MDPI journal article supplement (doi:10.3390/v13081652), 2021-08-20
Supplement: s1 [file s1]

# RNA and Sugars, Unique Properties of Bacteriophages Infecting Multidrug Resistant *Acinetobacter radioresistens* Strain LH6

Clay S. Crippen <sup>1,2</sup>, Bibi Zhou <sup>1,2</sup>, Silke Andresen <sup>1,2</sup>, Robert T. Patry <sup>1,2\*</sup>, Artur Muszyński <sup>2</sup>, Craig T. Parker <sup>3</sup>, Kerry K. Cooper <sup>4</sup> and Christine M. Szymanski <sup>1,2\*</sup>

Contained:

Supplementary Tables S1–S4

Supplementary Figures S1–S9

**Table S1.** Primers used in this study.

| Oligo                                  | Sequence 5' to 3'                                             | Use                                   |
|----------------------------------------|---------------------------------------------------------------|---------------------------------------|
| pP1capsid-F                            | GC <sup>TTT</sup> TC <sup>CAATT</sup> ATGCAGATCAGC            | Identifying SLAP1 prophage            |
| pP1capsid-R                            | GT <sup>TTT</sup> TACCCAGATTGTCATGAATG                        | Identifying SLAP1 prophage            |
| pP2capsid-F                            | TGAATGAGCTTAAAAAGCCGTG                                        | Identifying SLAP1 prophage            |
| pP2capsid-R                            | AGAATTTATTAGCGGCAATGGC                                        | Identifying SLAP1 prophage            |
| pBAV1K KAN-F                           | GACGTCAAATTCTATCATAAT                                         | PCR kan cassette                      |
| pBAV1K KAN-R                           | CTAAAAACAATTCATCCAGTAA                                        | PCR kan cassette                      |
| ApaI-KO <i>pglC</i> upstream-F         | GCAG <sup>GGCC</sup> CATGAAATTC <sup>T</sup> TAAATTATTGCTAGC  | PCR <i>pglC</i> construct upstream    |
| SphI-KO <i>pglC</i> upstream-R         | GCAG <sup>CATG</sup> CTTAGATTA <sup>AA</sup> CCCATTTCTTGCATC  | PCR <i>pglC</i> construct upstream    |
| SpeI-RBS-KO <i>pglC</i> downstream-F   | GCA <sup>ACTAGT</sup> AAGAAGGAGATATACATGACCAGTAATTCTGTTATGCG  | PCR <i>pglC</i> construct downstream  |
| PstI-KO <i>pglC</i> downstream-R       | GCAC <sup>TG</sup> CAGAGGATTAGCACCGGCTGTGACAATTG              | PCR <i>pglC</i> construct downstream  |
| ApaI-KO <i>pilA</i> upstream-F         | GCAG <sup>GGCC</sup> CGGGATTGATGATAGATTAGAAATTAAGAAATC        | PCR <i>pilA</i> construct upstream    |
| NcoI-KO <i>pilA</i> upstream-R         | GCAC <sup>CCAT</sup> GGGACGTC <sup>AA</sup> ATTCATCATAATTG    | PCR <i>pilA</i> construct upstream    |
| KO <i>pilA</i> upstream with kan pro-F | AATTTTCTTGGCATTATTAATTCCTTCCTCTTTCTAC                         | PCR <i>pilA</i> construct upstream    |
| KO <i>pilA</i> upstream with kan pro-R | GAAGGAAATAATAAATGCCAAGAAAAATTATACCTTACC                       | PCR <i>pilA</i> construct upstream    |
| SalI-KO <i>pilA</i> downstream-F       | GCAG <sup>TCG</sup> ACAACATTCTCCACCACATGTG                    | PCR <i>pilA</i> construct downstream  |
| SacI-KO <i>pilA</i> downstream-R       | GCAG <sup>AGCT</sup> CAAGTGCTTCCACTGCTGGTGTG                  | PCR <i>pilA</i> construct downstream  |
| ApaI-KO <i>lpsC</i> upstream-F         | GCAG <sup>GGCC</sup> CAGAATTCGGGGCTTTCAGAGCTC                 | PCR <i>lpsC</i> construct upstream    |
| SphI-KO <i>lpsC</i> upstream-R         | GCAG <sup>CATG</sup> CTCATAACTTATAACGTCCTTTAGC                | PCR <i>lpsC</i> construct upstream    |
| SpeI-RBS-KO <i>lpsC</i> downstream-F   | GCA <sup>ACTAGT</sup> AAGAAGGAGATATAC ATGAAAATTGTTCAAGTATTGGC | PCR <i>lpsC</i> construct downstream  |
| SalI-KO <i>lpsC</i> downstream-R       | GCAG <sup>TCG</sup> ACTTAAGTGTTTCAGCAACCTTTATAAAATTAAG        | PCR <i>lpsC</i> construct downstream  |
| SphI-KO <i>clsB</i> upstream-F         | GCAG <sup>CATG</sup> CCTTGGTCATGGTGCCTGTGATG                  | PCR <i>clsB</i> construct upstream    |
| NcoI-KO <i>clsB</i> upstream-R         | GCAC <sup>CATG</sup> GAAAAACAGATTACATTAATCTCG                 | PCR <i>clsB</i> construct upstream    |
| SpeI-RBS-KO <i>clsB</i> downstream-F   | GCA <sup>ACTAGT</sup> AAGAAGGAGATATACATGAAATCACGTGCAGCAGTCGC  | PCR <i>clsB</i> construct downstream  |
| SalI-KO <i>clsB</i> downstream-R       | GCAG <sup>TCG</sup> ACCTAAAAATGAATCACTGTACGGATAG              | PCR <i>clsB</i> construct downstream  |
| <i>lpsC</i> upstream F                 | ATGATGTGGTTTTTATACGTTG                                        | PCR <i>lpsC</i> knockout confirmation |
| <i>lpsC</i> downstream R               | CCTTTATAAATATTAAGCGTC                                         | PCR <i>lpsC</i> knockout confirmation |
| <i>clsB</i> upstream F                 | CCTGATATTCTATATAGTCCC                                         | PCR <i>clsB</i> knockout confirmation |
| <i>clsB</i> downstream R               | GATTTCGTACTACAGTGATTTC                                        | PCR <i>clsB</i> knockout confirmation |

Restriction sites are underlined, restriction enzymes (if applicable) are indicated.

**Table S2.** Small RNA segment open reading frames for CAP3-CAP7 phages.

| Segment Name | ORF Name | Protein Annotation         | Minimum | Maximum | Length | Direction |
|--------------|----------|----------------------------|---------|---------|--------|-----------|
| CAP3-S       | gp1      | Hypothetical protein       | 121     | 279     | 159    | forward   |
| CAP3-S       | gp2      | Hypothetical protein       | 283     | 963     | 681    | forward   |
| CAP3-S       | gp3      | Zinc finger protein 208    | 963     | 1421    | 459    | forward   |
| CAP3-S       | gp4      | Cysteine methyltransferase | 1436    | 1675    | 240    | forward   |
| CAP3-S       | gp5      | Hypothetical protein       | 1675    | 2676    | 1002   | forward   |
| CAP4-S       | gp1      | Hypothetical protein       | 120     | 278     | 159    | forward   |
| CAP4-S       | gp2      | Hypothetical protein       | 282     | 962     | 681    | forward   |
| CAP4-S       | gp3      | Zinc finger protein 208    | 962     | 1420    | 459    | forward   |
| CAP4-S       | gp4      | Cysteine methyltransferase | 1435    | 1674    | 240    | forward   |
| CAP4-S       | gp5      | Hypothetical protein       | 1674    | 2675    | 1002   | forward   |
| CAP5-S       | gp1      | Hypothetical protein       | 121     | 279     | 159    | forward   |
| CAP5-S       | gp2      | Hypothetical protein       | 283     | 963     | 681    | forward   |
| CAP5-S       | gp3      | Zinc finger protein 208    | 963     | 1421    | 459    | forward   |
| CAP5-S       | gp4      | Cysteine methyltransferase | 1436    | 1675    | 240    | forward   |
| CAP5-S       | gp5      | Hypothetical protein       | 1675    | 2676    | 1002   | forward   |
| CAP6-S       | gp1      | Hypothetical protein       | 121     | 279     | 159    | forward   |
| CAP6-S       | gp2      | Hypothetical protein       | 283     | 963     | 681    | forward   |
| CAP6-S       | gp3      | Zinc finger protein 208    | 963     | 1421    | 459    | forward   |
| CAP6-S       | gp4      | Cysteine methyltransferase | 1436    | 1675    | 240    | forward   |
| CAP6-S       | gp5      | Hypothetical protein       | 1675    | 2676    | 1002   | forward   |
| CAP7-S       | gp1      | Hypothetical protein       | 122     | 280     | 159    | forward   |
| CAP7-S       | gp2      | Hypothetical protein       | 284     | 964     | 681    | forward   |
| CAP7-S       | gp3      | Zinc finger protein 208    | 964     | 1422    | 459    | forward   |
| CAP7-S       | gp4      | Cysteine methyltransferase | 1437    | 1676    | 240    | forward   |
| CAP7-S       | gp5      | Hypothetical protein       | 1676    | 2677    | 1002   | forward   |

**Table S3.** Medium RNA segment open reading frames for CAP3-CAP7 phages.

| Segment Name | ORF Name | Protein Annotation                           | Minimum | Maximum | Length | Direction |
|--------------|----------|----------------------------------------------|---------|---------|--------|-----------|
| CAP3-M       | gp1      | Hypothetical protein                         | 38      | 184     | 147    | forward   |
| CAP3-M       | gp2      | SpoIIE-like protein phosphate domain protein | 213     | 908     | 696    | forward   |
| CAP3-M       | gp3      | Hypothetical protein                         | 917     | 1048    | 132    | forward   |
| CAP3-M       | gp4      | Hypothetical protein                         | 1177    | 1302    | 126    | forward   |
| CAP3-M       | gp5      | Hypothetical protein                         | 1299    | 1562    | 264    | forward   |
| CAP3-M       | gp6      | Amidohydrolase                               | 1474    | 3495    | 2022   | forward   |
| CAP4-M       | gp1      | Hypothetical protein                         | 38      | 184     | 147    | forward   |
| CAP4-M       | gp2      | SpoIIE-like protein phosphate domain protein | 213     | 908     | 696    | forward   |
| CAP4-M       | gp3      | Hypothetical protein                         | 918     | 1049    | 132    | forward   |
| CAP4-M       | gp4      | SRPBCC family protein                        | 1222    | 1383    | 162    | forward   |
| CAP4-M       | gp5      | Hypothetical protein                         | 1380    | 1652    | 273    | forward   |
| CAP4-M       | gp6      | Amidohydrolase                               | 1555    | 3585    | 2031   | forward   |
| CAP5-M       | gp1      | Hypothetical protein                         | 38      | 184     | 147    | forward   |
| CAP5-M       | gp2      | SpoIIE-like protein phosphate domain protein | 213     | 908     | 696    | forward   |
| CAP5-M       | gp3      | Hypothetical protein                         | 918     | 1049    | 132    | forward   |
| CAP5-M       | gp4      | SRPBCC family protein                        | 1222    | 1383    | 162    | forward   |
| CAP5-M       | gp5      | Hypothetical protein                         | 1380    | 1652    | 273    | forward   |
| CAP5-M       | gp6      | Amidohydrolase                               | 1555    | 3585    | 2031   | forward   |
| CAP6-M       | gp1      | Hypothetical protein                         | 38      | 184     | 147    | forward   |
| CAP6-M       | gp2      | SpoIIE-like protein phosphate domain protein | 213     | 908     | 696    | forward   |
| CAP6-M       | gp3      | Hypothetical protein                         | 918     | 1049    | 132    | forward   |
| CAP6-M       | gp4      | SRPBCC family protein                        | 1222    | 1383    | 162    | forward   |
| CAP6-M       | gp5      | Hypothetical protein                         | 1380    | 1652    | 273    | forward   |
| CAP6-M       | gp6      | Amidohydrolase                               | 1555    | 3585    | 2031   | forward   |
| CAP7-M       | gp1      | Hypothetical protein                         | 38      | 184     | 147    | forward   |
| CAP7-M       | gp2      | SpoIIE-like protein phosphate domain protein | 213     | 908     | 696    | forward   |
| CAP7-M       | gp3      | Hypothetical protein                         | 918     | 1049    | 132    | forward   |
| CAP7-M       | gp4      | SRPBCC family protein                        | 1222    | 1383    | 162    | forward   |
| CAP7-M       | gp5      | Hypothetical protein                         | 1380    | 1652    | 273    | forward   |
| CAP7-M       | gp6      | Amidohydrolase                               | 1555    | 3585    | 2031   | forward   |

**Table S4.** Large RNA segment open reading frames for CAP3-CAP7 phages.

| Segment Name | ORF Name | Protein Annotation   | Minimum | Maximum | Length | Direction |
|--------------|----------|----------------------|---------|---------|--------|-----------|
| CAP3-L       | gp2      | Hypothetical protein | 253     | 420     | 168    | forward   |
| CAP3-L       | gp3      | Hypothetical protein | 417     | 914     | 498    | forward   |
| CAP3-L       | gp4      | RNA polymerase       | 985     | 2937    | 1953   | forward   |
| CAP3-L       | gp5      | Packaging NTPase     | 2934    | 3947    | 1014   | forward   |
| CAP3-L       | gp6      | Hypothetical protein | 3957    | 6140    | 2184   | forward   |
| CAP4-L       | gp1      | Hypothetical protein | 259     | 558     | 300    | forward   |
| CAP4-L       | gp2      | Hypothetical protein | 603     | 770     | 168    | forward   |
| CAP4-L       | gp3      | Hypothetical protein | 767     | 1264    | 498    | forward   |
| CAP4-L       | gp4      | RNA polymerase       | 1335    | 3285    | 1951   | forward   |
| CAP4-L       | gp5      | Packaging NTPase     | 3282    | 4295    | 1014   | forward   |
| CAP4-L       | gp6      | Hypothetical protein | 4305    | 6488    | 2184   | forward   |
| CAP5-L       | gp1      | Hypothetical protein | 296     | 559     | 264    | forward   |
| CAP5-L       | gp2      | Hypothetical protein | 604     | 771     | 168    | forward   |
| CAP5-L       | gp3      | Hypothetical protein | 768     | 1265    | 498    | forward   |
| CAP5-L       | gp4      | RNA polymerase       | 1336    | 3288    | 1953   | forward   |
| CAP5-L       | gp5      | Packaging NTPase     | 3285    | 4298    | 1014   | forward   |
| CAP5-L       | gp6      | Hypothetical protein | 4308    | 6491    | 2184   | forward   |
| CAP6-L       | gp1      | Hypothetical protein | 272     | 559     | 288    | forward   |
| CAP6-L       | gp2      | Hypothetical protein | 604     | 771     | 168    | forward   |
| CAP6-L       | gp3      | Hypothetical protein | 768     | 1265    | 498    | forward   |
| CAP6-L       | gp4      | RNA polymerase       | 1336    | 3288    | 1953   | forward   |
| CAP6-L       | gp5      | Packaging NTPase     | 3285    | 4298    | 1014   | forward   |
| CAP6-L       | gp6      | Hypothetical protein | 4308    | 6491    | 2184   | forward   |
| CAP7-L       | gp1      | Hypothetical protein | 272     | 559     | 288    | forward   |
| CAP7-L       | gp2      | Hypothetical protein | 604     | 771     | 168    | forward   |
| CAP7-L       | gp3      | Hypothetical protein | 768     | 1265    | 498    | forward   |
| CAP7-L       | gp4      | RNA polymerase       | 1336    | 3288    | 1953   | forward   |
| CAP7-L       | gp5      | Packaging NTPase     | 3285    | 4298    | 1014   | forward   |
| CAP7-L       | gp6      | Hypothetical protein | 4308    | 6491    | 2184   | forward   |



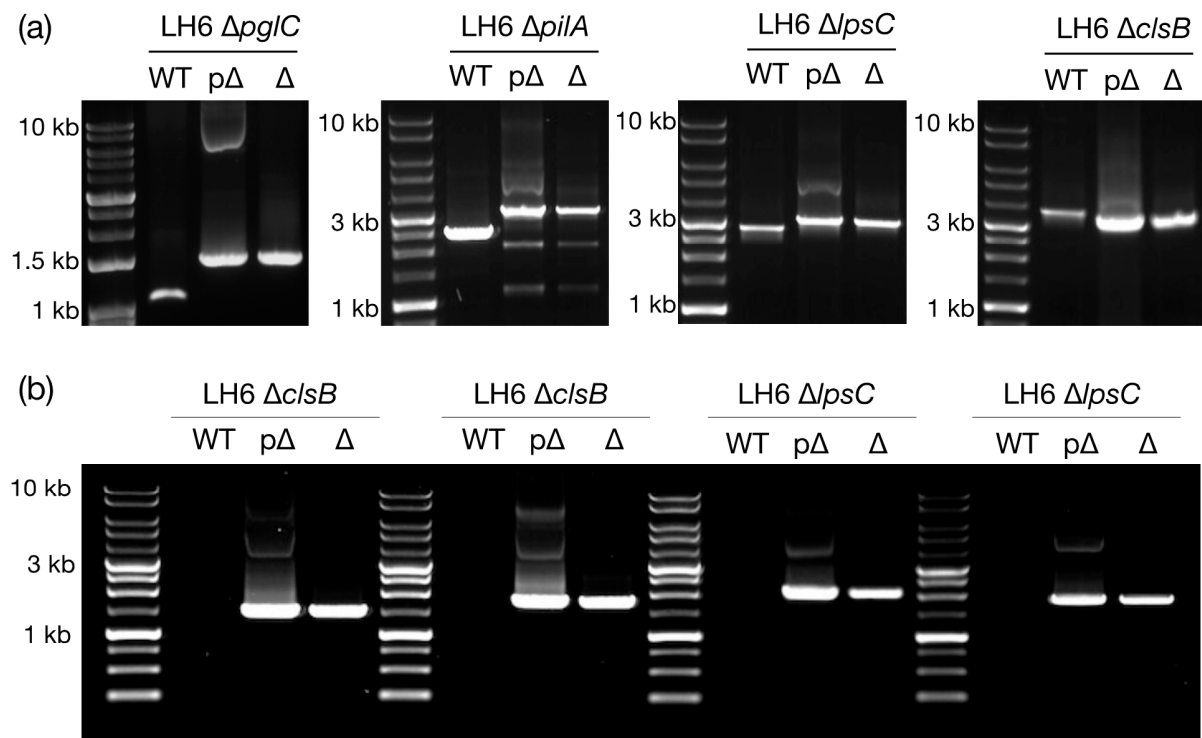

**Figure S1.** PCR confirmation of LH6 mutagenesis in genes *pglC*, *pilA*, *lpsC*, and *clsB*. Lane labels are as follows: WT represents PCR of LH6 wild type genomic DNA; pΔ represents PCR of knockout construct plasmid; Δ represents PCR of indicated mutant genomic DNA. (a) Products were generated using primers flanking the recombination event. (b) Products for *clsB* and *lpsC* were generated using primers inside of the insertional kanamycin cassette and in the regions of homology upstream (left of each pair) and downstream (right of each pair) of the deleted gene target as additional confirmation.

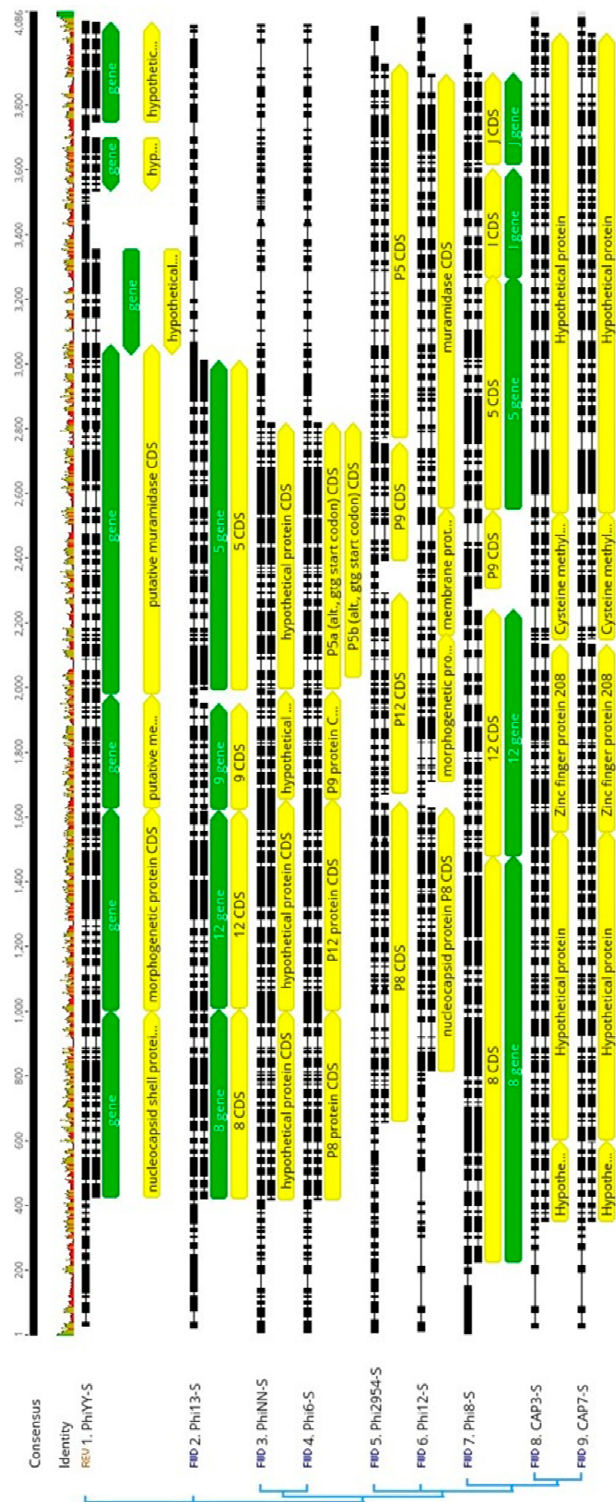



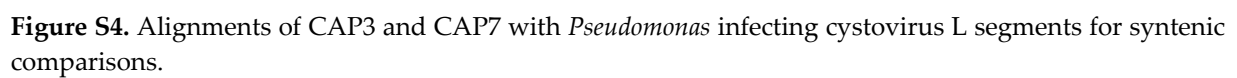

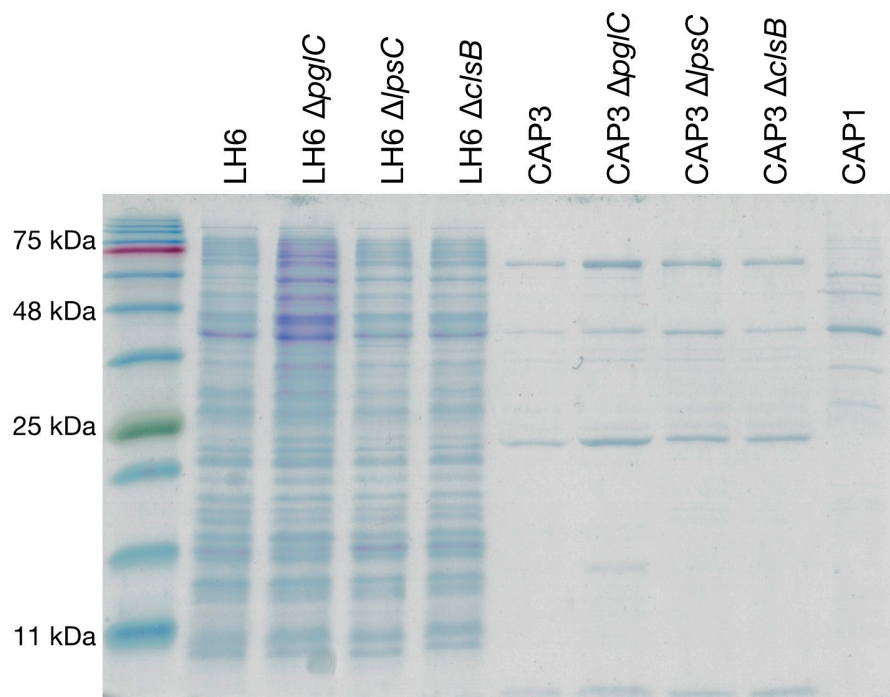

**Figure S5.** Coomassie stained 15% SDS-PAGE of lysates from *A. radioresistens* LH6 cells and purified CAP1 and CAP3 phages corresponding to proteinase K treated lysates seen in Figure 7a. The mutant name next to CAP3 indicates which LH6 mutant the CAP3 phage was propagated on before purification and analysis.



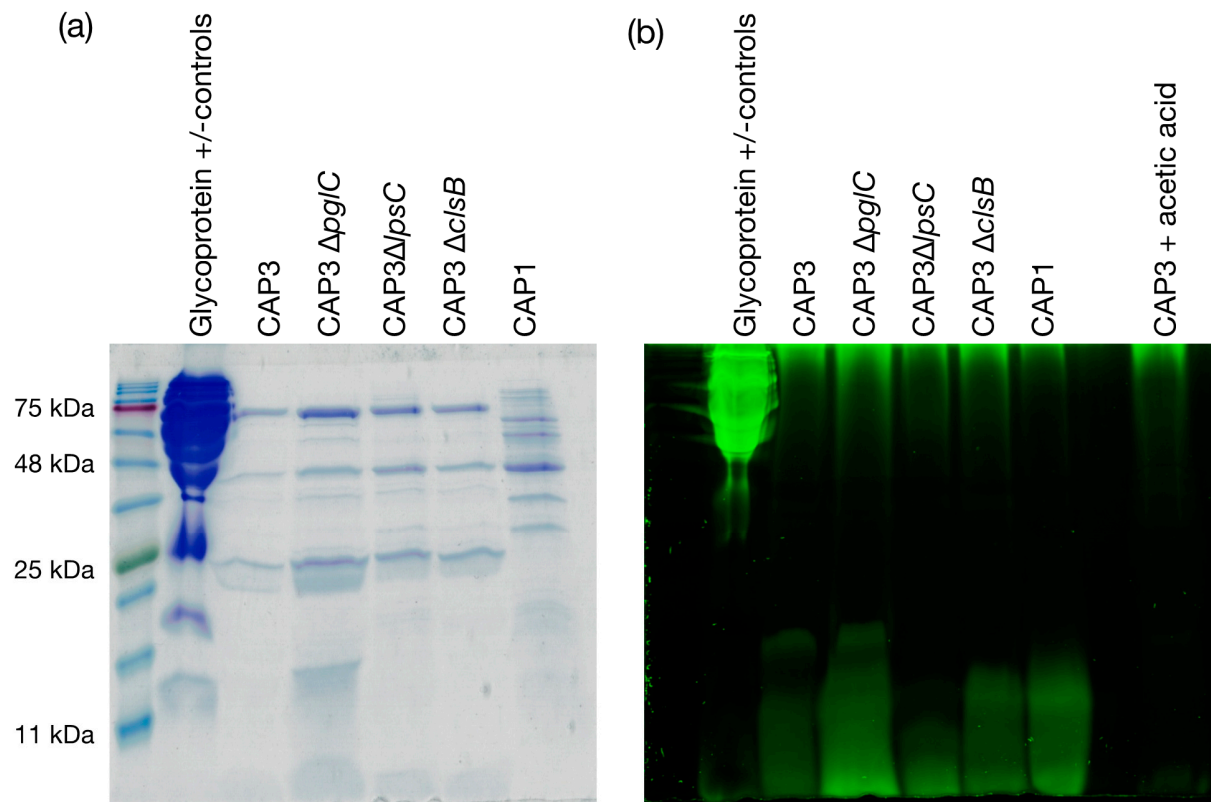

**Figure S6.** Coomassie and Pro-Q™ Emerald 300 stained gels of CAP3 and CAP1 lysates. (a) CAP3 and CAP1 lysates were separated on 15% SDS-PAGE and Coomassie stained. (b) Proteinase K treated CAP3 and CAP1 lysates were separated on 15% SDS-PAGE and stained for glycans (part shown in Figure 7c). A glycoprotein standard was included as part of the kit (staining controls appear as a cluster of positive glycoprotein bands between 40-80 kD and non-glycoprotein bands are only visible when stained with Coomassie) was used to confirm the activity of the glycostain. The mutant name next to CAP3 indicates which LH6 mutant the CAP3 phage was propagated on before purification and analysis. CAP3 was also treated with 1% acetic acid to determine which glycans were lipid-linked and would disappear due to disruption of the labile bond.

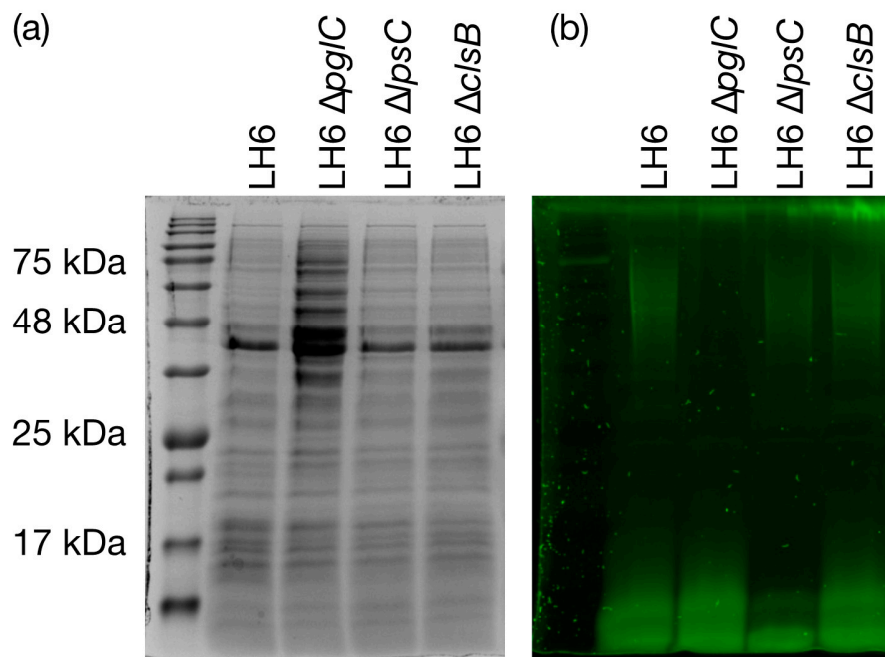

**Figure S7.** Coomassie and Pro-Q™ Emerald 300 stained gels of LH6 lysates. (a) Approximately equivalent amounts of LH6 WT and mutant cells were lysed, separated on a 12.5% SDS-PAGE gel and stained with Coomassie stain. (b) A duplicate gel showing LH6 WT and mutant cells after proteinase K treatment and separation on a 12.5% SDS-PAGE gel (part shown in Figure 7d). The gel was stained with Pro-Q™ Emerald 300 glycan stain to visualize capsular polysaccharides (~30-75 kDa) and low molecular weight glycans (<17 kDa).

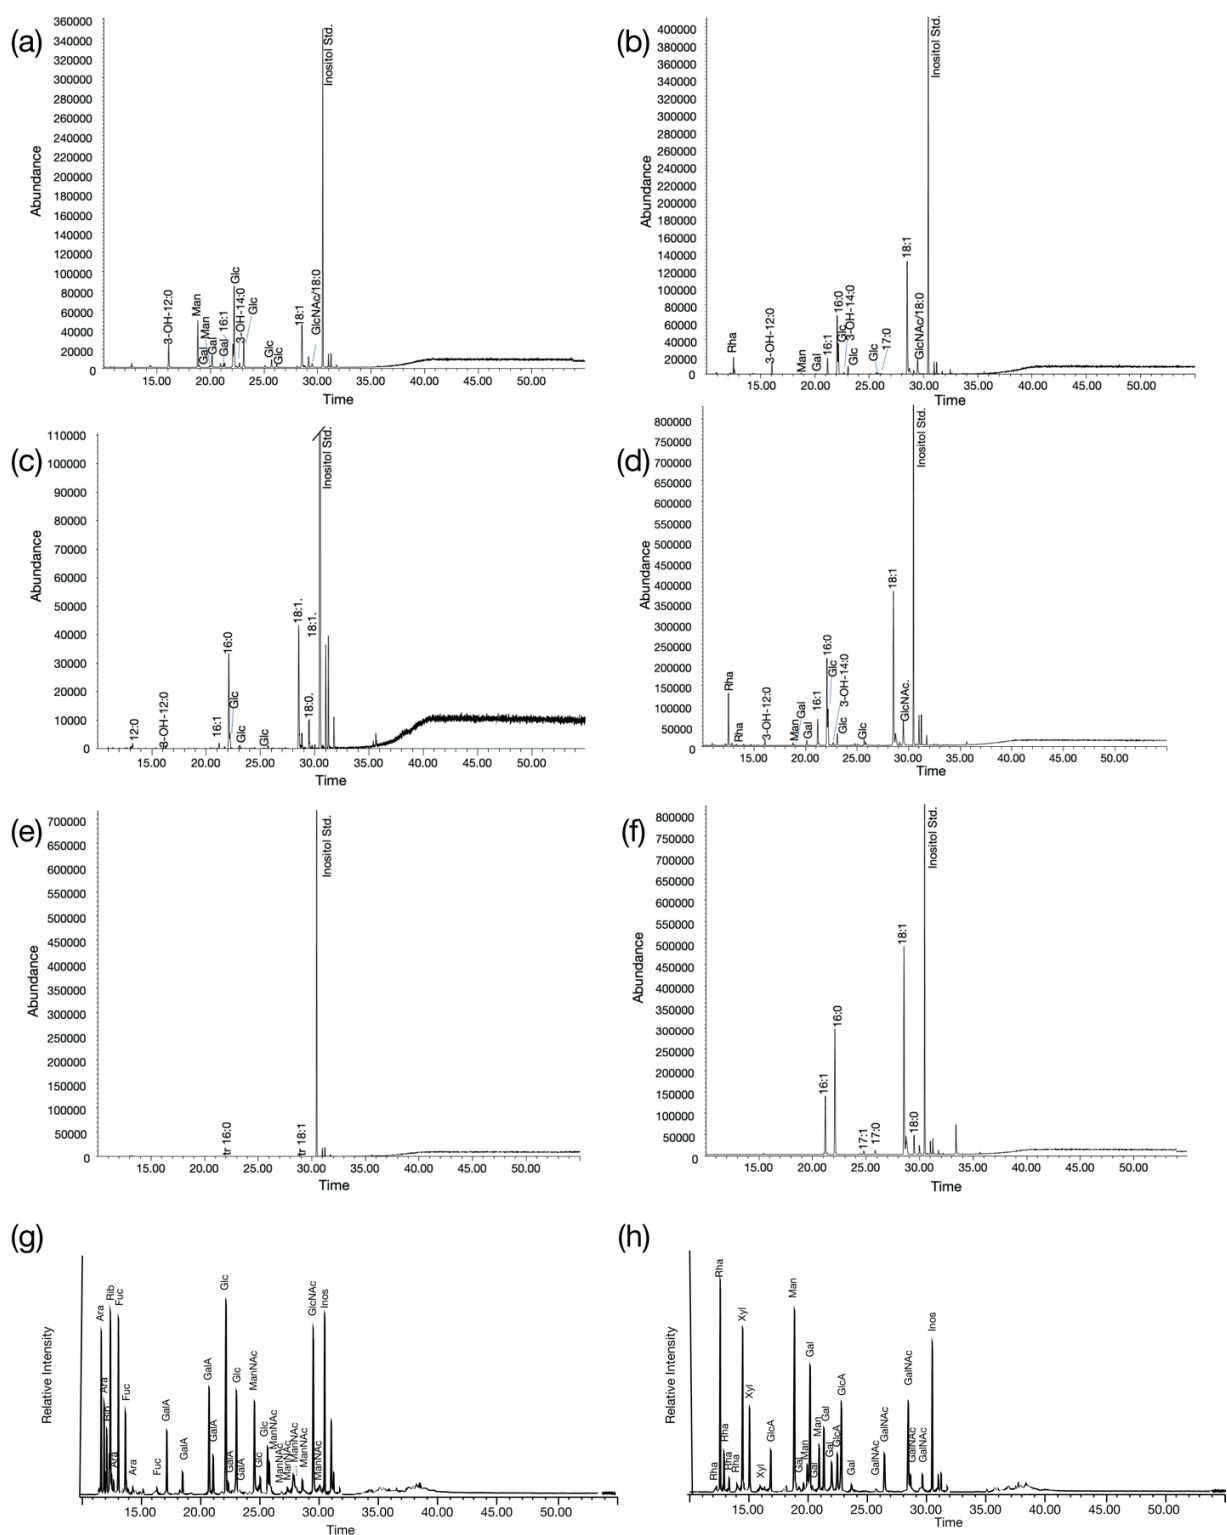

**Figure S8.** All GC-MS chromatograms corresponding to the experiment represented in Figure 8 and standard monosaccharides. Panel identities are as follows: (a) CAP3 aqueous (b) LH6 aqueous (c) CAP3 interphase (d) LH6 interphase (e) CAP3 organic phase (f) LH6 organic phase. (g, h) Total electron ionization (EI) ion GC-MS chromatograms of monosaccharides converted to trimethylsilyl (TMS) methyl glycosides.



Each monomeric sugar that is converted to TMS-derivatives will form stereoisomers that elute at different retention times. The monosaccharides were grouped into two standard mixtures (g, h) to prevent the co-elution of diagnostic peaks. A relative retention time and the EI mass fragmentation for individual glycosyl residues were used in all analyzed samples to identify the glycosyl residues. Legend: Ara - arabinose, Rib - ribose, Fuc - fucose, GalA – galacturonic acid, Glc - glucose, ManNAc – N-acetylmannosamine, GlcNAc - N-acetylglucosamine, Rha- rhamnose, Xyl- xylose, GlcA – glucuronic acid, Gal – galactose, Man- mannose, GalNAc - N-acetylgalactosamine, Inos - *myo*-inositol.

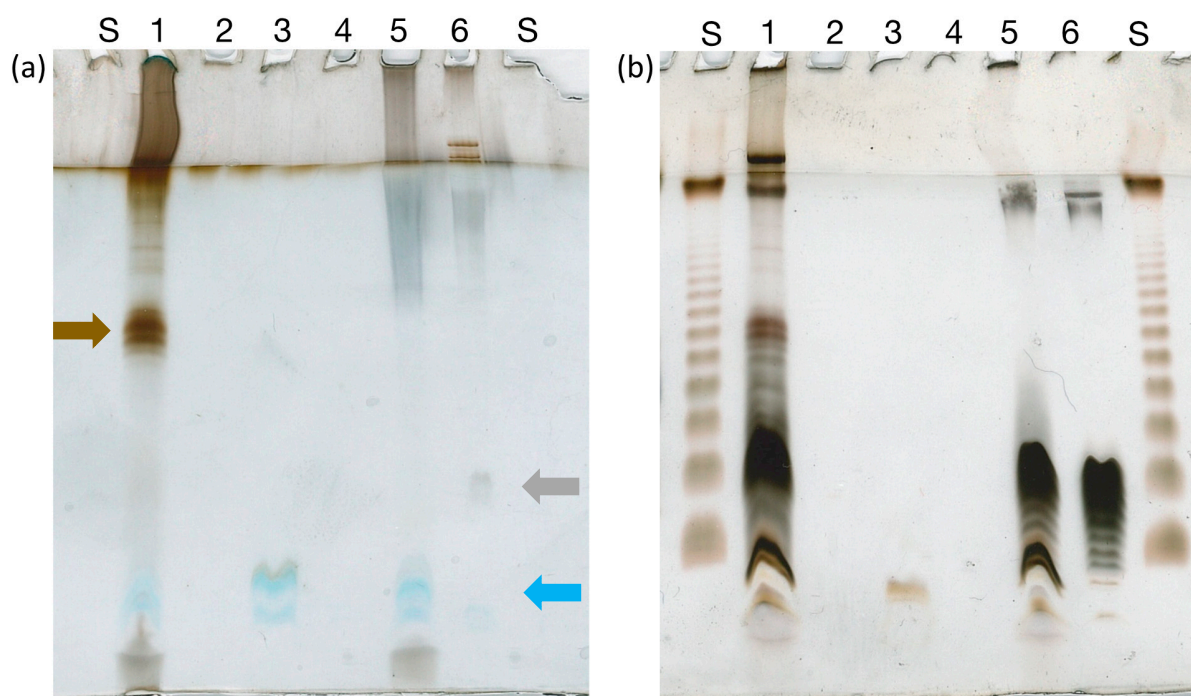

**Figure S9.** 18% DOC-PAGE analysis of bacterial and phage extracts examined by GC-MS in Figure S8 (and Figure 8). (a) Samples were stained overnight with alcian blue and with silver reagent without periodate oxidation prior to silver staining. (b) Samples were oxidized with periodate followed by silver staining. Lanes: S: *Salmonella enterica* serovar Minnesota S-type LPS; Number labels correspond to the following phases: 1: LH6 interphase, 2: CAP3 interphase, 3: LH6 organic phase, 4: CAP3 organic phase 5: LH6 aqueous, 6: CAP3 aqueous. Brown arrow corresponds to most abundant fragment sizes of LH6 CPS. Blue arrow may represent free lipid A or phospholipids. Grey arrow points to uniquely staining phage component that may correspond to band above LOS in Figure 7c.
